# Supplementary material for: ALKBH5-HOXA10 loop-mediated JAK2 m6A demethylation and platinum resistance in epithelial ovarian cancer
Source: Research Square preprint supplement (doi:10.21203/rs.3.rs-390666/v1), 2021-04-09
Supplement: Supplementary file 1 [file 2c8009b268e5ae9e8e473fa2.docx]

**Supplementary Table 3**

| siRNA | Sense sequence of siRNA (5’-3’) |
| --- | --- |
| siALKBH5 | UCAGAUCGCCUGUCAGGAATT |
| siHOXA10 | GCAAAGAGUGGUCGGAAGATT |
| siYTHDF2 | TTGGCTATGGGAACGTCTT |

Selected sequences of siRNA of target genes with the best knocking down efficiency.
